# Supplementary material for: Immune checkpoint blockade for locally advanced or recurrent/metastatic cervical cancer: An update on clinical data
Source: Frontiers journal article supplement (doi:10.3389/fonc.2022.1045481), 2022-12-22
Supplement: Table_3.pdf [file Table_3.pdf]

# Abbreviations

|               |                                                       |                                  |                                                 |
|---------------|-------------------------------------------------------|----------------------------------|-------------------------------------------------|
| <b>ADC</b>    | antibody-drug conjugate                               | <b>MSI</b>                       | microsatellite instability                      |
| <b>AEs</b>    | adverse events                                        | <b>mut/Mb</b>                    | mutations per million bases                     |
| <b>ASCO</b>   | American Society of Clinical Oncology                 | <b>NCCN</b>                      | National Comprehensive Cancer Network           |
| <b>CC</b>     | cervical cancer                                       | <b>NK</b>                        | natural killer                                  |
| <b>CCRT</b>   | concurrent chemoradiotherapy                          | <b>NMPA</b>                      | China National Medical Products Administration  |
| <b>CPS</b>    | combined positive score                               | <b>ORR</b>                       | objective response rate                         |
| <b>CRs</b>    | complete responses                                    | <b>OS</b>                        | overall survival                                |
| <b>CTLA-4</b> | cytotoxic T-lymphocyte-associated protein 4           | <b>PD-1</b>                      | programmed cell death-1                         |
| <b>DCR</b>    | disease control rate                                  | <b>PD-L1</b>                     | programmed cell death ligand-1                  |
| <b>DCs</b>    | dendritic cells                                       | <b>PFS</b>                       | progression-free survival                       |
| <b>DLTs</b>   | dose-limiting toxicities                              | <b>PRs</b>                       | partial responses                               |
| <b>DMFS</b>   | distance metastasis-free survival                     | <b>R/M</b>                       | recurrent/metastatic                            |
| <b>DOR</b>    | duration of response                                  | <b>SCC</b>                       | squamous cell carcinoma                         |
| <b>FDA</b>    | U.S. Food and Drug Administration                     | <b>SDs</b>                       | stable disease                                  |
| <b>FIGO</b>   | International Federation of Gynecology and Obstetrics | <b>SGO</b>                       | Society for Gynecologic Oncology                |
| <b>HPV</b>    | human papillomavirus                                  | <b>TGF-<math>\beta</math>RII</b> | transforming growth factor- $\beta$ receptor II |
| <b>hrHPVs</b> | high-risk HPV subtypes                                | <b>TIGIT</b>                     | T cell immunoglobulin and ITIM domains          |
| <b>ICB</b>    | immune checkpoint blockade                            | <b>TILs</b>                      | tumor-infiltrating lymphocytes                  |
| <b>ICOS</b>   | inducible T-cell costimulator                         | <b>TMB</b>                       | tumor mutational burden                         |
| <b>IDO1</b>   | indoleamine 2, 3-dioxygenase 1                        | <b>TME</b>                       | tumor microenvironment                          |
| <b>irAE</b>   | immune-related adverse events                         | <b>TRAEs</b>                     | treatment-related adverse events                |
| <b>LACC</b>   | locally advanced cervical cancer                      | <b>TV</b>                        | Tisotumab vedotin                               |
| <b>mAb</b>    | monoclonal antibody                                   | <b>VEGFR-2</b>                   | vascular endothelial growth factor receptor-2   |
